# Supplementary material
Source: Research Square preprint supplement (doi:10.21203/rs.3.rs-8652991/v1)
Supplement: Supplementary file 1 [file 252e2fed419192f3f7bf4d82.docx]

**Table 1: Distribution of the Sociodemographic Characteristics of the Experimental Group**

| **Sociodemographic characteristics** | **n** | **%** |
| --- | --- | --- |
| **Age** |  |  |
| 19-20  21 and above | 16  14 | 53.3  46.7 |
| **Gender** |  |  |
| Female  Male | 23  7 | 76.6  23.3 |
| **Level of Education** |  |  |
| Health Vocational High School  Anatolian High School  Vocational High School  Private High School | 22  6  1  1 | 73.3  20  3.3  3.3 |
| **Level of Income** |  |  |
| Good  Moderate  Poor | 2  21  7 | 6.7  70  23.3 |

Distribution of the Experimental Group According to Sociodemographic Characteristics n; sample size, %; percentage

#### **Table 2.** **Comparison of Scores of the Experimental and Control Groups from the General Knowledge Checklist, SES, PSLS, and TCP Competence Scales**

| **Variables** | **Experimental** | | | **Control** | | | **Mann Whitney U** | **p value** |
| --- | --- | --- | --- | --- | --- | --- | --- | --- |
| **Mean ± sd** | **M (Min - Max)** | **Cronbach α** | **Mean ± sd** | **M (Min - Max)** | **Cronbach α** |
| **Knowledge** | 13.57 ± 1.31 | 14 (9-15) | 0.785 | 5.13 ± 1.46 | 5 (2-8) | 0.659 | 6.716 | ***0.001**** |
| **SES** | 62.13 ± 10.67 | 64.5 (33-81) | 0.835 | 63.73 ± 10.18 | 63.5 (45-91) | 0.711 | 443.500 | 0.920 |
| **PSLS** | 34.13 ± 4.67 | 35 (18-45) | 0.703 | 29.67 ± 7.43 | 31 (5-44) | 0.736 | 259.000 | ***0.005**** |
| **TCP competence** | 35.3 ± 3.35 | 36 (28-39) | 0.822 | 17.23 ± 3.11 | 17 (13-24) | 0.775 | 0.004 | ***0.001**** |

Distribution and Comparison of Sociodemographic Characteristics of the Experimental and Control Groups n; sample size, %; percentage

**Table 3: Evaluation of Responses to TCP Knowledge Questions after SBST**

| **Variable** | **Value** | | | **Experimental** | **Control** | **Total** | **ꭓ2** | **p** |
| --- | --- | --- | --- | --- | --- | --- | --- | --- |
| Do paramedics have authorization to apply transcutaneous pacemakers? | | **Correct** | **n** | 30 | 27 | 57 | ***0.229*** | 0.036 |
| **%** | 100.0% | 90.0% | 95.0% |
| **Incorrect** | **n** | 0 | 3 | 3 |
| **%** | 0.0% | 10.0% | 5.0% |
| Mark the incorrect statement among the following transcutaneous pacemaker items. | | **Correct** | **n** | 29 | 19 | 48 | ***0.417*** | ***0.001**** |
| **%** | 96.7% | 63.3% | 80.0% |
| **Incorrect** | **n** | 1 | 11 | 12 |
| **%** | 3.3% | 36.7% | 20.0% |
| In which situations is a transcutaneous pacemaker applied? | | **Correct** | **n** | 28 | 12 | 40 | ***0.566*** | ***<0.001**** |
| **%** | 93.3% | 40.0% | 66.7% |
| **Incorrect** | **n** | 2 | 18 | 20 |
| **%** | 6.7% | 60.0% | 33.3% |
| Mark the correct option from the following. | | **Correct** | **n** | 29 | 0 | 29 | ***0.967*** | ***<0.001**** |
| **%** | 96.7% | 0.0% | 48.3% |
| **Incorrect** | **n** | 1 | 30 | 31 |
| **%** | 3.3% | 100.0% | 51.7% |
| Which of the following is not a type of pacemaker? | | **Correct** | **n** | 24 | 1 | 25 | ***0.778*** | ***<0.001**** |
| **%** | 80.0% | 3.3% | 41.7% |
| **Incorrect** | **n** | 6 | 29 | 35 |
| **%** | 20.0% | 96.7% | 58.3% |
| Which mode of the defibrillator needs to be activated to apply a transcutaneous pacemaker? | | **Correct** | **n** | 30 | 5 | 35 | ***0.845*** | ***<0.001**** |
| **%** | 100.0% | 16.7% | 58.3% |
| **Incorrect** | **n** | 0 | 25 | 25 |
| **%** | 0.0% | 83.3% | 41.7% |
| In which region(s) should the defibrillator pads be placed for a transcutaneous pacemaker application? | | **Correct** | **n** | 16 | 6 | 22 | ***0.346*** | ***0.007**** |
| **%** | 53.3% | 20.0% | 36.7% |
| **Incorrect** | **n** | 14 | 24 | 38 |
| **%** | 46.7% | 80.0% | 63.3% |
| What is the sufficient heart rate to maintain blood pressure and perfusion in transcutaneous pacemaker application? | | **Correct** | **n** | 30 | 16 | 46 | ***0.552*** | ***<0.001**** |
| **%** | 100.0% | 53.3% | 76.7% |
| **Incorrect** | **n** | 0 | 14 | 14 |
| **%** | 0.0% | 46.7% | 23.3% |
| How is the energy level (mA) adjusted in transcutaneous pacemaker application? | | **Correct** | **n** | 28 | 18 | 46 | ***0.394*** | ***0.002**** |
| **%** | 93.3% | 60.0% | 76.7% |
| **Incorrect** | **n** | 2 | 12 | 14 |
| **%** | 6.7% | 40.0% | 23.3% |
| What is the next step after setting the speed and mA level in transcutaneous pacemaker application? | | **Correct** | **n** | 29 | 20 | 49 | ***0.388*** | ***0.003**** |
| **%** | 96.7% | 66.7% | 81.7% |
| **Incorrect** | **n** | 1 | 10 | 11 |
| **%** | 3.3% | 33.3% | 18.3% |
| Is there an additional medication therapy for transcutaneous pacemaker application? If so, mark the correct one. | | **Correct** | **n** | 27 | 8 | 35 | ***0.642*** | ***<0.001**** |
| **%** | 90.0% | 26.7% | 58.3% |
| **Incorrect** | **n** | 3 | 22 | 25 |
| **%** | 10.0% | 73.3% | 41.7% |
| What is the most important complication of transcutaneous pacemaker application? | | **Correct** | **n** | 30 | 4 | 34 | ***0.874*** | ***<0.001**** |
| **%** | 100.0% | 13.3% | 56.7% |
| **Incorrect** | **n** | 0 | 26 | 26 |
| **%** | 0.0% | 86.7% | 43.3% |
| In which situations is a transcutaneous pacemaker not applied? | | **Correct** | **n** | 30 | 9 | 39 | ***0.734*** | ***<0.001**** |
| **%** | 100.0% | 30.0% | 65.0% |
| **Incorrect** | **n** | 0 | 21 | 21 |
| **%** | 0.0% | 70.0% | 35.0% |
| What should be done for conscious patients who feel discomfort after transcutaneous pacemaker application? | | **Correct** | **n** | 22 | 1 | 23 | ***0.720*** | ***<0.001**** |
| **%** | 73.3% | 3.3% | 38.3% |
| **Incorrect** | **n** | 8 | 29 | 37 |
| **%** | 26.7% | 96.7% | 61.7% |
| Which of the following statements is incorrect? | | **Correct** | **n** | 25 | 8 | 33 | ***0.570*** | ***<0.001**** |
| **%** | 83.3% | 26.7% | 55.0% |
| **Incorrect** | **n** | 5 | 22 | 27 |
| **%** | 16.7% | 73.3% | 45.0% |
|  | |  |  |  |  |  |  |  |

Comparison of Responses to Post-Training Knowledge Questions Between Experimental and Control Groups; number of responses, %; percentage

**Table 4. Evaluation of Responses to TCP Competence Questions after SBST**

| **Variable** | **Group** | **Value** | **Experimental** | **Control** | **Total** | **ꭓ2** | **p** |
| --- | --- | --- | --- | --- | --- | --- | --- |
| Defines the indications for transcutaneous pacemaker. | **Needs Improvement** | **n** | 0 | 7 | 7 | ***0.565*** | ***<0.001**** |
| **%** | 0.0% | 23.3% | 11.7% |
| **Sufficient** | **n** | 3 | 12 | 15 |
| **%** | 10.0% | 40.0% | 25.0% |
| **Mastered** | **n** | 27 | 11 | 38 |
| **%** | 90.0% | 36.7% | 63.3% |
| Identifies the patient and explains the procedures to be performed if it is not an emergency. | **Needs Improvement** | **n** | 0 | 8 | 8 | ***0.682*** | ***<0.001**** |
| **%** | 0.0% | 26.7% | 13.3% |
| **Sufficient** | **n** | 5 | 17 | 22 |
| **%** | 16.7% | 56.7% | 36.7% |
| **Mastered** | **n** | 25 | 5 | 30 |
| **%** | 83.3% | 16.7% | 50.0% |
| If time permits, ensures patient stabilization (ECG, SpO2, O2 support, intravenous catheter). | **Needs Improvement** | **n** | 0 | 18 | 18 | ***0.764*** | ***<0.001**** |
| **%** | 0.0% | 60.0% | 30.0% |
| **Sufficient** | **n** | 13 | 12 | 25 |
| **%** | 43.3% | 40.0% | 41.7% |
| **Mastered** | **n** | 17 | 0 | 17 |
| **%** | 56.7% | 0.0% | 28.3% |
| Turns on the monitor/defibrillator/pacer and applies the ECG electrodes to the patient. | **Needs Improvement** | **n** | 0 | 22 | 22 | ***1.000*** | ***<0.001**** |
| **%** | 0.0% | 73.3% | 36.7% |
| **Sufficient** | **n** | 0 | 8 | 8 |
| **%** | 0.0% | 26.7% | 13.3% |
| **Mastered** | **n** | 30 | 0 | 30 |
| **%** | 100.0% | 0.0% | 50.0% |
| Disconnects the defibrillator paddles and connects the pacing electrodes. | **Needs Improvement** | **n** | 0 | 27 | 27 | ***0.927*** | ***<0.001**** |
| **%** | 0.0% | 90.0% | 45.0% |
| **Sufficient** | **n** | 7 | 3 | 10 |
| **%** | 23.3% | 10.0% | 16.7% |
| **Mastered** | **n** | 23 | 0 | 23 |
| **%** | 76.7% | 0.0% | 38.3% |
| Places the electrodes in the appropriate region. | **Needs Improvement** | **n** | 1 | 16 | 17 | ***0.737*** | ***<0.001**** |
| **%** | 3.3% | 53.3% | 28.3% |
| **Sufficient** | **n** | 8 | 13 | 21 |
| **%** | 26.7% | 43.3% | 35.0% |
| **Mastered** | **n** | 21 | 1 | 22 |
| **%** | 70.0% | 3.3% | 36.7% |
| Presses the 'PACER' button. (Pacing can be performed in Demand (synchronous) or Fixed (asynchronous) mode.) | **Needs Improvement** | **n** | 0 | 27 | 27 | ***0.908*** | ***<0.001**** |
| **%** | 0.0% | 90.0% | 45.0% |
| **Sufficient** | **n** | 11 | 2 | 13 |
| **%** | 36.7% | 6.7% | 21.7% |
| **Mastered** | **n** | 19 | 1 | 20 |
| **%** | 63.3% | 3.3% | 33.3% |
| Selects the desired pacing rate. (Sets the rate between 60-90 bpm.) | **Needs Improvement** | **n** | 0 | 27 | 27 | ***0.909*** | ***<0.001**** |
| **%** | 0.0% | 90.0% | 45.0% |
| **Sufficient** | **n** | 3 | 1 | 4 |
| **%** | 10.0% | 3.3% | 6.7% |
| **Mastered** | **n** | 27 | 2 | 29 |
| **%** | 90.0% | 6.7% | 48.3% |
| Adjusts the energy level (mA). | **Needs Improvement** | **n** | 1 | 30 | 31 | ***0.967*** | ***<0.001**** |
| **%** | 3.3% | 100.0% | 51.7% |
| **Sufficient** | **n** | 9 | 0 | 9 |
| **%** | 30.0% | 0.0% | 15.0% |
| **Mastered** | **n** | 20 | 0 | 20 |
| **%** | 66.7% | 0.0% | 33.3% |
| Once the capture threshold is reached, increases the current by 2-5 mA to finalize the current (capture is expected in the range of 50-100 mA). | **Needs Improvement** | **n** | 1 | 30 | 31 | ***0.967*** | ***<0.001**** |
| **%** | 3.3% | 100.0% | 51.7% |
| **Sufficient** | **n** | 11 | 0 | 11 |
| **%** | 36.7% | 0.0% | 18.3% |
| **Mastered** | **n** | 18 | 0 | 18 |
| **%** | 60.0% | 0.0% | 30.0% |
| Observes the QRS complex following the pacemaker spike on the monitor and simultaneously palpates the peripheral pulses. | **Needs Improvement** | **n** | 1 | 30 | 31 | ***0.967*** | ***<0.001**** |
| **%** | 3.3% | 100.0% | 51.7% |
| **Sufficient** | **n** | 9 | 0 | 9 |
| **%** | 30.0% | 0.0% | 15.0% |
| **Mastered** | **n** | 20 | 0 | 20 |
| **%** | 66.7% | 0.0% | 33.3% |
| Records patient information and vital signs. | **Needs Improvement** | **n** | 0 | 30 | 30 | ***1.000*** | ***<0.001**** |
| **%** | 0.0% | 100.0% | 50.0% |
| **Sufficient** | **n** | 16 | 0 | 16 |
| **%** | 53.3% | 0.0% | 26.7% |
| **Mastered** | **n** | 14 | 0 | 14 |
| **%** | 46.7% | 0.0% | 23.3% |
| Describes the complications of transcutaneous pacemaker application. | **Needs Improvement** | **n** | 0 | 13 | 13 | ***0.728*** | ***<0.001**** |
| **%** | 0.0% | 43.3% | 21.7% |
| **Sufficient** | **n** | 8 | 15 | 23 |
| **%** | 26.7% | 50.0% | 38.3% |
| **Mastered** | **n** | 22 | 2 | 24 |
| **%** | 73.3% | 6.7% | 40.0% |

Intergroup Comparison of Responses to TCP Competency Questions After Training (n; number of responses, %; percentage)
